# Supplementary material for: Effects of Different Cultivation Parameters on the Production of Surfactin Variants by a Bacillus subtilis Strain
Source: PubMed Central journal article supplement (PMC6222309; doi:10.3390/molecules23102675), 2018-10-18
Supplement: molecules-23-02675-s001.pdf [file molecules-23-02675-s001.pdf]

**Table S1.** Percentage ratios of the different surfactin variants and homologues in the original sample.

| Original                           |              |             |              |             |              |             |             |
|------------------------------------|--------------|-------------|--------------|-------------|--------------|-------------|-------------|
| Ratio of variant and deviation (%) |              |             |              |             |              |             |             |
|                                    | [Sur]        | [Val2]      | [Val7]       | [Val2,7]    | [AME5]       | [AME5,Val7] | [Lxx4,AME5] |
| C13                                | 1.62 (0.07)  | 0.20 (0.01) | 1.09 (0.06)  | nd.         | nd.          | nd.         | nd.         |
| C14                                | 3.39 (0.10)  | nd.         | 2.10 (0.17)  | 0.37 (0.03) | nd.          | nd.         | nd.         |
| C15                                | 6.67 (0.30)  | 2.92 (0.27) | 4.15 (0.34)  | 2.38 (0.20) | 6.58 (0.14)  | nd.         | nd.         |
| C16                                | 11.42 (0.86) | nd.         | 13.68 (0.84) | nd.         | 15.02 (0.26) | nd.         | 0.18 (0.02) |
| C17                                | 6.90 (0.33)  | nd.         | 3.69 (0.41)  | nd.         | 7.85 (0.59)  | 2.80 (0.31) | 0.12 (0.01) |
| C18                                | nd.          | nd.         | nd.          | nd.         | 3.58 (0.06)  | 3.29 (0.31) | nd.         |

nd. – not detected

**Table S2.** Percentage ratios of the different [Sur]factin variants and homologues in the sample modified with cellobiose carbon source.

| Cellobiose                         |              |             |              |             |              |             |             |
|------------------------------------|--------------|-------------|--------------|-------------|--------------|-------------|-------------|
| Ratio of variant and deviation (%) |              |             |              |             |              |             |             |
|                                    | [Sur]        | [Val2]      | [Val7]       | [Val2,7]    | [AME5]       | [AME5,Val7] | [Lxx4,AME5] |
| C13                                | 1.17 (0.07)  | 0.20 (0.01) | 0.68 (0.04)  | nd.         | nd.          | nd.         | nd.         |
| C14                                | 3.95 (0.35)  | nd.         | 1.16 (0.07)  | 0.13 (0.02) | nd.          | nd.         | nd.         |
| C15                                | 10.43 (0.95) | 3.17 (0.45) | 2.68 (0.17)  | 1.17 (0.22) | 10.52 (0.58) | nd.         | nd.         |
| C16                                | 9.25 (0.56)  | nd.         | 11.82 (0.51) | nd.         | 15.55 (1.58) | nd.         | 0.71 (0.09) |
| C17                                | 7.19 (0.73)  | nd.         | 2.22 (0.14)  | nd.         | 8.78 (0.62)  | 1.64 (0.20) | 0.28 (0.02) |
| C18                                | nd.          | nd.         | nd.          | nd.         | 4.49 (0.47)  | 2.81 (0.18) | nd.         |

nd. – not detected

**Table S3.** Percentage ratios of the different [Sur]factin variants and homologues in the sample modified with starch carbon source.

| <b>Starch</b>                             |             |             |              |             |              |             |             |
|-------------------------------------------|-------------|-------------|--------------|-------------|--------------|-------------|-------------|
| <b>Ratio of variant and deviation (%)</b> |             |             |              |             |              |             |             |
|                                           | [Sur]       | [Val2]      | [Val7]       | [Val2,7]    | [AME5]       | [AME5,Val7] | [Lxx4,AME5] |
| C13                                       | 1.61 (0.20) | 0.23 (0.01) | 0.65 (0.02)  | nd.         | nd.          | nd.         | nd.         |
| C14                                       | 4.58 (0.28) | nd.         | 1.28 (0.17)  | 0.13 (0.01) | nd.          | nd.         | nd.         |
| C15                                       | 8.89 (0.70) | 2.98 (0.31) | 2.71 (0.19)  | 1.18 (0.10) | 10.96 (0.46) | nd.         | nd.         |
| C16                                       | 8.72 (0.72) | nd.         | 10.62 (0.10) | nd.         | 17.27 (0.67) | nd.         | 0.73 (0.04) |
| C17                                       | 7.12 (0.65) | nd.         | 2.59 (0.23)  | nd.         | 8.82 (0.82)  | 1.63 (0.08) | 0.42 (0.07) |
| C18                                       | nd.         | nd.         | nd.          | nd.         | 3.98 (0.35)  | 2.88 (0.15) | nd.         |

nd. – not detected

**Table S4.** Percentage ratios of the different [Sur]factin variants and homologues in the sample modified with maltose carbon source.

| <b>Maltose</b>                            |             |             |              |             |              |             |             |
|-------------------------------------------|-------------|-------------|--------------|-------------|--------------|-------------|-------------|
| <b>Ratio of variant and deviation (%)</b> |             |             |              |             |              |             |             |
|                                           | [Sur]       | [Val2]      | [Val7]       | [Val2,7]    | [AME5]       | [AME5,Val7] | [Lxx4,AME5] |
| C13                                       | 1.56 (0.04) | 0.25 (0.01) | 1.18 (0.08)  | nd.         | nd.          | nd.         | nd.         |
| C14                                       | 3.35 (0.36) | nd.         | 1.72 (0.49)  | 0.27 (0.02) | nd.          | nd.         | nd.         |
| C15                                       | 7.07 (0.39) | 3.39 (0.43) | 3.56 (0.11)  | 1.49 (0.14) | 8.39 (0.56)  | nd.         | nd.         |
| C16                                       | 9.35 (0.25) | nd.         | 13.28 (0.05) | nd.         | 15.22 (1.12) | nd.         | 0.17 (0.02) |
| C17                                       | 7.28 (1.53) | nd.         | 3.90 (0.05)  | nd.         | 9.05 (0.83)  | 2.86 (0.01) | 0.32 (0.03) |
| C18                                       | nd.         | nd.         | nd.          | nd.         | 3.67 (0.36)  | 2.66 (0.26) | nd.         |

nd. – not detected

**Table S5.** Percentage ratios of the different [Sur]factin variants and homologues in the sample modified with ethanol carbon source.

| <b>Ethanol</b>                            |              |             |              |             |              |             |             |
|-------------------------------------------|--------------|-------------|--------------|-------------|--------------|-------------|-------------|
| <b>Ratio of variant and deviation (%)</b> |              |             |              |             |              |             |             |
|                                           | [Sur]        | [Val2]      | [Val7]       | [Val2,7]    | [AME5]       | [AME5,Val7] | [Lxx4,AME5] |
| C13                                       | 1.72 (0.17)  | 0.33 (0.02) | 1.26 (0.07)  | nd.         | nd.          | nd.         | nd.         |
| C14                                       | 2.12 (0.37)  | nd.         | 1.52 (0.13)  | 0.22 (0.03) | nd.          | nd.         | nd.         |
| C15                                       | 7.04 (0.36)  | 4.93 (0.35) | 3.70 (0.11)  | 1.95 (0.17) | 12.34 (0.54) | nd.         | nd.         |
| C16                                       | 12.72 (0.48) | nd.         | 18.43 (0.57) | nd.         | 14.42 (0.94) | nd.         | 0.01 (0.00) |
| C17                                       | 7.91 (0.12)  | nd.         | 4.03 (0.48)  | nd.         | 0.24 (0.01)  | 1.60 (0.22) | 0.14 (0.01) |
| C18                                       | nd.          | nd.         | nd.          | nd.         | 3.33 (0.21)  | 0.06 (0.01) | nd.         |

nd. – not detected

**Table S6.** Percentage ratios of the different [Sur]factin variants and homologues in the sample modified with mannitol carbon source.

| <b>Mannitol</b>                           |             |             |              |             |              |             |             |
|-------------------------------------------|-------------|-------------|--------------|-------------|--------------|-------------|-------------|
| <b>Ratio of variant and deviation (%)</b> |             |             |              |             |              |             |             |
|                                           | [Sur]       | [Val2]      | [Val7]       | [Val2,7]    | [AME5]       | [AME5,Val7] | [Lxx4,AME5] |
| C13                                       | 1.95 (0.05) | 0.37 (0.05) | 0.96 (0.08)  | nd.         | nd.          | nd.         | nd.         |
| C14                                       | 5.08 (0.15) | nd.         | 1.87 (0.32)  | 0.20 (0.04) | nd.          | nd.         | nd.         |
| C15                                       | 9.86 (0.85) | 4.16 (0.45) | 2.51 (0.25)  | 1.09 (0.06) | 11.27 (0.40) | nd.         | nd.         |
| C16                                       | 9.04 (0.88) | nd.         | 11.96 (0.31) | nd.         | 17.16 (0.22) | nd.         | 0.41 (0.08) |
| C17                                       | 5.95 (0.71) | nd.         | 2.39 (0.34)  | nd.         | 6.52 (1.07)  | 0.83 (0.19) | 0.22 (0.06) |
| C18                                       | nd.         | nd.         | nd.          | nd.         | 4.10 (0.09)  | 2.10 (0.19) | nd.         |

nd. – not detected

**Table S7.** Percentage ratios of the different [Sur]fascin variants and homologues in the sample modified with fructose carbon source.

| <b>Fructose</b>                           |             |             |              |             |             |             |             |
|-------------------------------------------|-------------|-------------|--------------|-------------|-------------|-------------|-------------|
| <b>Ratio of variant and deviation (%)</b> |             |             |              |             |             |             |             |
|                                           | [Sur]       | [Val2]      | [Val7]       | [Val2,7]    | [AME5]      | [AME5,Val7] | [Lxx4,AME5] |
| C13                                       | 1.27 (0.08) | 0.06 (0.01) | 2.22 (0.13)  | nd.         | nd.         | nd.         | nd.         |
| C14                                       | 3.87 (0.16) | nd.         | 4.34 (0.15)  | 1.74 (0.31) | nd.         | nd.         | nd.         |
| C15                                       | 6.51 (0.18) | 3.71 (0.16) | 10.76 (0.67) | 5.95 (0.13) | 7.90 (0.59) | nd.         | nd.         |
| C16                                       | 9.23 (1.14) | nd.         | 14.78 (0.45) | nd.         | 8.34 (1.21) | nd.         | 0.20 (0.02) |
| C17                                       | 6.49 (0.62) | nd.         | 2.71 (0.32)  | nd.         | 5.08 (0.09) | 1.40 (0.14) | 0.14 (0.01) |
| C18                                       | nd.         | nd.         | nd.          | nd.         | 1.50 (0.23) | 1.80 (0.16) | nd.         |

nd. – not detected

**Table S8.** Percentage ratios of the different [Sur]fascin variants and homologues in the sample modified with glycerin carbon source.

| <b>Glycerin</b>                           |             |             |             |             |              |             |             |
|-------------------------------------------|-------------|-------------|-------------|-------------|--------------|-------------|-------------|
| <b>Ratio of variant and deviation (%)</b> |             |             |             |             |              |             |             |
|                                           | [Sur]       | [Val2]      | [Val7]      | [Val2,7]    | [AME5]       | [AME5,Val7] | [Lxx4,AME5] |
| C13                                       | 1.20 (0.09) | 0.52 (0.04) | 2.48 (0.13) | nd.         | nd.          | nd.         | nd.         |
| C14                                       | 5.14 (0.18) | nd.         | 3.97 (0.54) | 0.81 (0.08) | nd.          | nd.         | nd.         |
| C15                                       | 7.03 (0.41) | 4.88 (0.18) | 3.31 (0.14) | 3.55 (0.28) | 11.40 (0.13) | nd.         | nd.         |
| C16                                       | 9.51 (0.63) | nd.         | 7.91 (0.23) | nd.         | 14.33 (0.66) | nd.         | 0.30 (0.05) |
| C17                                       | 6.32 (0.56) | nd.         | 2.77 (0.51) | nd.         | 7.37 (0.65)  | 1.06 (0.22) | 0.18 (0.03) |
| C18                                       | nd.         | nd.         | nd.         | nd.         | 3.07 (0.41)  | 2.89 (0.42) | nd.         |

nd. – not detected

**Table S9.** Percentage ratios of the different [Sur]facticin variants and homologues in the sample modified with sucrose carbon source.

| <b>Sucrose</b>                            |              |             |              |             |              |             |             |
|-------------------------------------------|--------------|-------------|--------------|-------------|--------------|-------------|-------------|
| <b>Ratio of variant and deviation (%)</b> |              |             |              |             |              |             |             |
|                                           | [Sur]        | [Val2]      | [Val7]       | [Val2,7]    | [AME5]       | [AME5,Val7] | [Lxx4,AME5] |
| C13                                       | 1.03 (0.19)  | 0.23 (0.00) | 0.58 (0.00)  | nd.         | nd.          | nd.         | nd.         |
| C14                                       | 2.92 (0.22)  | nd.         | 0.99 (0.02)  | 0.14 (0.01) | nd.          | nd.         | nd.         |
| C15                                       | 9.33 (0.35)  | 2.81 (0.09) | 1.94 (0.08)  | 0.69 (0.02) | 12.16 (0.06) | nd.         | nd.         |
| C16                                       | 11.77 (0.96) | nd.         | 11.40 (0.42) | nd.         | 20.28 (0.21) | nd.         | 0.83 (0.08) |
| C17                                       | 6.10 (0.48)  | nd.         | 1.19 (0.18)  | nd.         | 8.96 (0.41)  | 0.60 (0.05) | 0.50 (0.03) |
| C18                                       | nd.          | nd.         | nd.          | nd.         | 3.53 (0.24)  | 2.01 (0.38) | nd.         |

nd. – not detected

**Table S10.** Percentage ratios of the different [Sur]facticin variants and homologues in the sample modified with xylose carbon source.

| <b>Xylose</b>                             |              |             |             |             |              |             |             |
|-------------------------------------------|--------------|-------------|-------------|-------------|--------------|-------------|-------------|
| <b>Ratio of variant and deviation (%)</b> |              |             |             |             |              |             |             |
|                                           | [Sur]        | [Val2]      | [Val7]      | [Val2,7]    | [AME5]       | [AME5,Val7] | [Lxx4,AME5] |
| C13                                       | 3.24 (0.24)  | 0.91 (0.07) | 1.26 (0.07) | nd.         | nd.          | nd.         | nd.         |
| C14                                       | 5.89 (0.38)  | nd.         | 1.57 (0.24) | 0.28 (0.04) | nd.          | nd.         | nd.         |
| C15                                       | 13.86 (1.17) | 4.46 (0.15) | 2.07 (0.18) | 0.61 (0.09) | 14.21 (2.31) | nd.         | nd.         |
| C16                                       | 6.70 (0.55)  | nd.         | 8.05 (0.92) | nd.         | 15.68 (1.66) | nd.         | 0.07 (0.01) |
| C17                                       | 7.31 (0.67)  | nd.         | 2.40 (0.12) | nd.         | 5.16 (0.48)  | 1.35 (0.05) | 0.08 (0.01) |
| C18                                       | nd.          | nd.         | nd.         | nd.         | 2.93 (0.30)  | 1.91 (0.10) | nd.         |

nd. – not detected

**Table S11.** Percentage ratios of the different [Sur]factin variants and homologues in the sample modified with manganese metal ion.

| <b>Manganese</b>                          |             |             |             |             |              |              |             |
|-------------------------------------------|-------------|-------------|-------------|-------------|--------------|--------------|-------------|
| <b>Ratio of variant and deviation (%)</b> |             |             |             |             |              |              |             |
|                                           | [Sur]       | [Val2]      | [Val7]      | [Val2,7]    | [AME5]       | [AME5,Val7]  | [Lxx4,AME5] |
| C11                                       | nd.         | nd.         | nd.         | nd.         | 0.19 (0.00)  | nd.          | nd.         |
| C12                                       | 0.17 (0.01) | nd.         | nd.         | nd.         | 0.75 (0.04)  | 0.17 (0.01)  | nd.         |
| C13                                       | 0.12 (0.02) | nd.         | 0.44 (0.04) | nd.         | 4.49 (0.21)  | 1.69 (0.28)  | nd.         |
| C14                                       | 0.90 (0.14) | 0.64 (0.07) | 0.62 (0.06) | 0.19 (0.02) | 12.54 (1.05) | 2.74 (0.16)  | nd.         |
| C15                                       | nd.         | nd.         | nd.         | nd.         | 28.21 (2.18) | 8.81 (0.88)  | 1.16 (0.17) |
| C16                                       | 0.31 (0.05) | nd.         | nd.         | nd.         | 21.69 (3.40) | 6.78 (0.24)  | 7.40 (0.89) |
| C17                                       | nd.         | nd.         | nd.         | nd.         | 59.09 (5.68) | 10.29 (0.82) | 3.28 (0.55) |
| C18                                       | nd.         | nd.         | nd.         | nd.         | 21.85 (1.69) | 19.18 (1.41) | nd.         |

nd. – not detected

**Table S12.** Percentage ratios of the different [Sur]factin variants and homologues in the sample modified with copper metal ion.

| <b>Copper</b>                             |             |             |             |             |              |             |             |
|-------------------------------------------|-------------|-------------|-------------|-------------|--------------|-------------|-------------|
| <b>Ratio of variant and deviation (%)</b> |             |             |             |             |              |             |             |
|                                           | [Sur]       | [Val2]      | [Val7]      | [Val2,7]    | [AME5]       | [AME5,Val7] | [Lxx4,AME5] |
| C11                                       | nd.         | nd.         | nd.         | nd.         | 0.19 (0.02)  | nd.         | nd.         |
| C12                                       | 0.20 (0.00) | nd.         | nd.         | nd.         | 0.12 (0.01)  | 0.20 (0.02) | nd.         |
| C13                                       | 0.18 (0.01) | nd.         | 0.59 (0.07) | nd.         | 2.33 (0.05)  | 1.64 (0.19) | nd.         |
| C14                                       | 0.75 (0.02) | 0.23 (0.03) | 0.77 (0.09) | 0.10 (0.01) | 6.03 (1.08)  | 5.38 (0.76) | nd.         |
| C15                                       | nd.         | nd.         | nd.         | nd.         | 10.70 (0.81) | 3.37 (0.19) | 0.73 (0.02) |
| C16                                       | 0.48 (0.06) | nd.         | nd.         | nd.         | 4.90 (0.36)  | 0.46 (0.08) | 1.62 (0.17) |
| C17                                       | nd.         | nd.         | nd.         | nd.         | 28.63 (1.09) | 6.94 (0.54) | 0.69 (0.06) |
| C18                                       | nd.         | nd.         | nd.         | nd.         | 13.77 (0.54) | 9.00 (0.54) | nd.         |

nd. – not detected

**Table S13.** Percentage ratios of the different [Sur]factin variants and homologues in the sample modified with nickel metal ion.

| <b>Nickel</b>                             |             |             |             |             |              |              |             |
|-------------------------------------------|-------------|-------------|-------------|-------------|--------------|--------------|-------------|
| <b>Ratio of variant and deviation (%)</b> |             |             |             |             |              |              |             |
|                                           | [Sur]       | [Val2]      | [Val7]      | [Val2,7]    | [AME5]       | [AME5,Val7]  | [Lxx4,AME5] |
| C11                                       | nd.         | nd.         | nd.         | nd.         | 0.15 (0.01)  | nd.          | nd.         |
| C12                                       | 0.17 (0.02) | nd.         | nd.         | nd.         | 0.10 (0.01)  | 0.14 (0.02)  | nd.         |
| C13                                       | 0.14 (0.01) | nd.         | 0.60 (0.04) | nd.         | 1.50 (0.06)  | 1.25 (0.09)  | nd.         |
| C14                                       | 0.56 (0.02) | 0.08 (0.01) | 1.04 (0.10) | 0.07 (0.02) | 4.13 (0.29)  | 5.31 (0.72)  | nd.         |
| C15                                       | nd.         | nd.         | nd.         | nd.         | 8.21 (0.49)  | 6.92 (0.16)  | 0.19 (0.03) |
| C16                                       | 1.11 (0.13) | nd.         | nd.         | nd.         | 11.72 (0.42) | 0.97 (0.22)  | 0.45 (0.06) |
| C17                                       | nd.         | nd.         | nd.         | nd.         | 23.22 (0.82) | 10.81 (1.41) | 0.23 (0.05) |
| C18                                       | nd.         | nd.         | nd.         | nd.         | 9.46 (1.22)  | 11.48 (0.09) | nd.         |

nd. – not detected
